# Supplementary material for: The photoluminescence of CuInS2nanocrystals: effect of non-stoichiometry and surface modification
Source: Royal Society of Chemistry journal article supplement (doi:10.1039/c1jm13170b), 2011-11-28
Supplement: c1jm13170b.pdf [file c1jm13170b.pdf]

## Supplementary Materials

### 1. Composition analysis of CuInS<sub>2</sub> nanocrystals with various copper deficiency

Table S1. Composition of CuInS<sub>2</sub> nanocrystals with various copper deficiency

| Cu <sub>1-x</sub> InS <sub>2</sub> |            |            |                 |
|------------------------------------|------------|------------|-----------------|
| x(starting composition)            | ICP-MS     |            |                 |
|                                    | [Cu] (at%) | [In] (at%) | x (nanocrystal) |
| 0                                  | 49.8       | 50.2       | 0.01            |
| 0.2                                | 44.6       | 55.4       | 0.19            |
| 0.5                                | 34.1       | 65.9       | 0.48            |
| 0.8                                | 15.5       | 84.5       | 0.81            |

The comparison of the copper deficiency (x) in the apparent composition of starting precursors and in the nanocrystals measured with ICP-MS was performed. As shown in table1, the copper deficiency in Cu<sub>1-x</sub>InS<sub>2</sub> nanocrystals is consistent to the composition of starting precursors.

### 2. Composition analysis of the surface modified Cu<sub>0.2</sub>InS<sub>2</sub> nanocrystals

Table S2. Composition of the Cu<sub>0.2</sub>InS<sub>2</sub>/MS (M=Zn, Cd) nanocrystals after surface modification

| Nanocrystals                            | ICP-MS     |            |            |            |           |
|-----------------------------------------|------------|------------|------------|------------|-----------|
|                                         | [Cu] (at%) | [In] (at%) | [Zn] (at%) | [Cd] (at%) | [Cu]/[In] |
| Cu <sub>0.2</sub> InS <sub>2</sub> /ZnS | 6.1        | 31.2       | 62.7       | -          | 0.19      |
| Cu <sub>0.2</sub> InS <sub>2</sub> /CdS | 7.7        | 46.3       | -          | 46.0       | 0.17      |

The compositional analysis by ICP-MS for core/shell CIS nanocrystals were presented in table S2. The incorporation of shell materials was confirmed with this data. In addition, the copper deficiency in Cu<sub>1-x</sub>InS<sub>2</sub> nanocrystals is consistent to the composition of starting precursors.

### 3. Transmission electron microscopy of CdS-capped $\text{Cu}_{0.2}\text{InS}_2$ nanocrystals

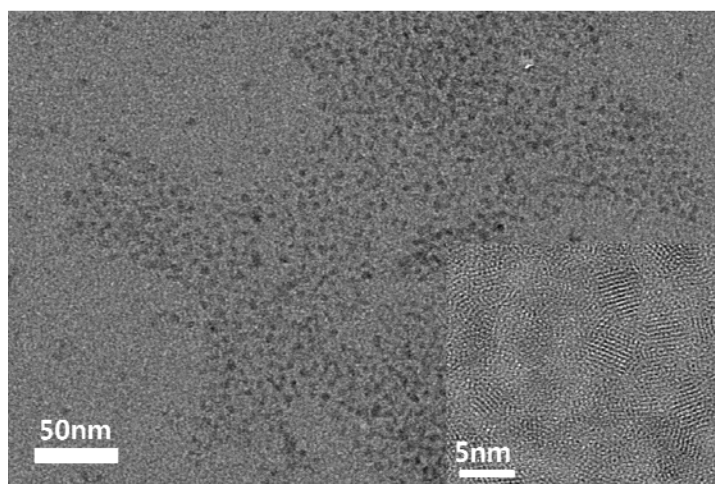

Figure S1. TEM image of  $\text{Cu}_{0.2}\text{InS}_2/\text{CdS}$  nanocrystals

The size/shape distribution of  $\text{Cu}_{0.2}\text{InS}_2/\text{CdS}$  nanocrystals was shown by a TEM image. Inset image shows their lattice image.

#### 4. Controlled etching of nanocrystals

Nanocrystals for etching were prepared by the procedure described by Battaglia *et al.*[ D. Battaglia, B. Blackman, X. Peng. *J. Am. Chem. Soc.*2005, 127, 10889.] The surface ligands of nanocrystals were exchanged with benzyl amine by mixing 0.5ml of nanocrystals solution with 1ml of benzyl amine (BA, 99%, Sigma-Aldrich) and sonicating for 10 minutes. Subsequently, 0.2ml of ligand-exchanged nanocrystal solution was added to 3ml of 1:2 methanol/toluene solution. 0.2M solution of benzoyl peroxide (BPO, 97%, Alfa aesar) was prepared by dissolving BPO to 1:2 methanol/toluene solvent. To start etching process, 0.2ml of 0.2M solution of BPO was added to the BA-capped nanocrystal solution.

The change in absorbance during etching process was measured with kinetics program using Cary5000 UV/VIS/NIR spectrometer at 450nm. Photoluminescence of nanocrystals were checked with Horiba Jovin-Yvon HR LabRam Raman/PL spectrometer excited with green laser ( $\lambda=514.5\text{nm}$ ). Photoluminescence of nanocrystals during etching process was checked every 1 minutes

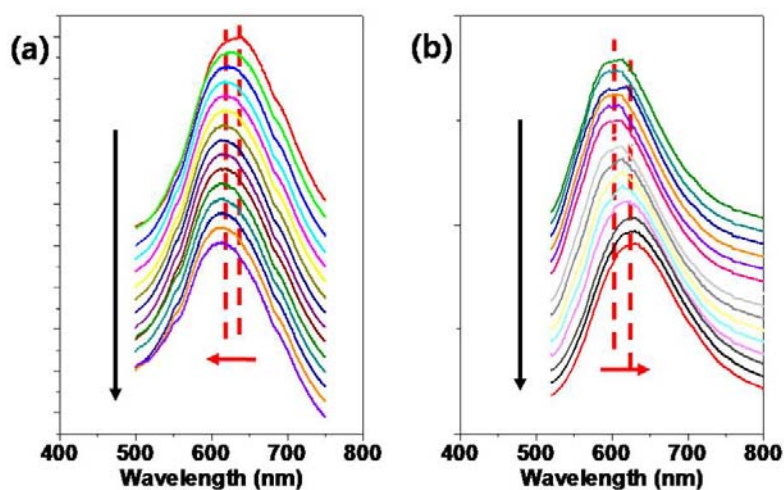

Figure S2. Change in photoluminescence spectra of nanocrystals during the first 15 minutes in the etching process: (a)  $\text{Cu}_{0.2}\text{InS}_2$  (b)  $\text{Cu}_{0.2}\text{InS}_2/\text{ZnS}$ . The black arrows indicate time evolution.
